# Supplementary material for: Bioderived Ionic Liquids and Salts with Various Cyano Anions as Precursors for Doped Carbon Materials
Source: MDPI journal article supplement (doi:10.3390/ijms221910426), 2021-09-27

## Supporting Information

### **Bio-derived ionic liquids and salts with various cyano anions as precursors for doped carbon materials**

**Alina Brzęczek-Szafran<sup>1,\*</sup>, Bartłomiej Gaida<sup>1</sup>, Agata Blacha-Grzechnik<sup>1</sup>, Karolina Matuszek<sup>2</sup>, and Anna Chrobok<sup>1</sup>**

1 Faculty of Chemistry, Silesian University of Technology, Krzywoustego 4, Gliwice, 44-100, Poland

2 School of Chemistry, Monash University, Clayton 3800, VIC, Australia

\* Correspondence: [alina.brzeczek-szafran@polsl.pl](mailto:alina.brzeczek-szafran@polsl.pl)

**Figure S1.**  $^1\text{H}$  and  $^{13}\text{C}$  NMR spectra of the investigated carbohydrate-derived ionic liquids and salts.

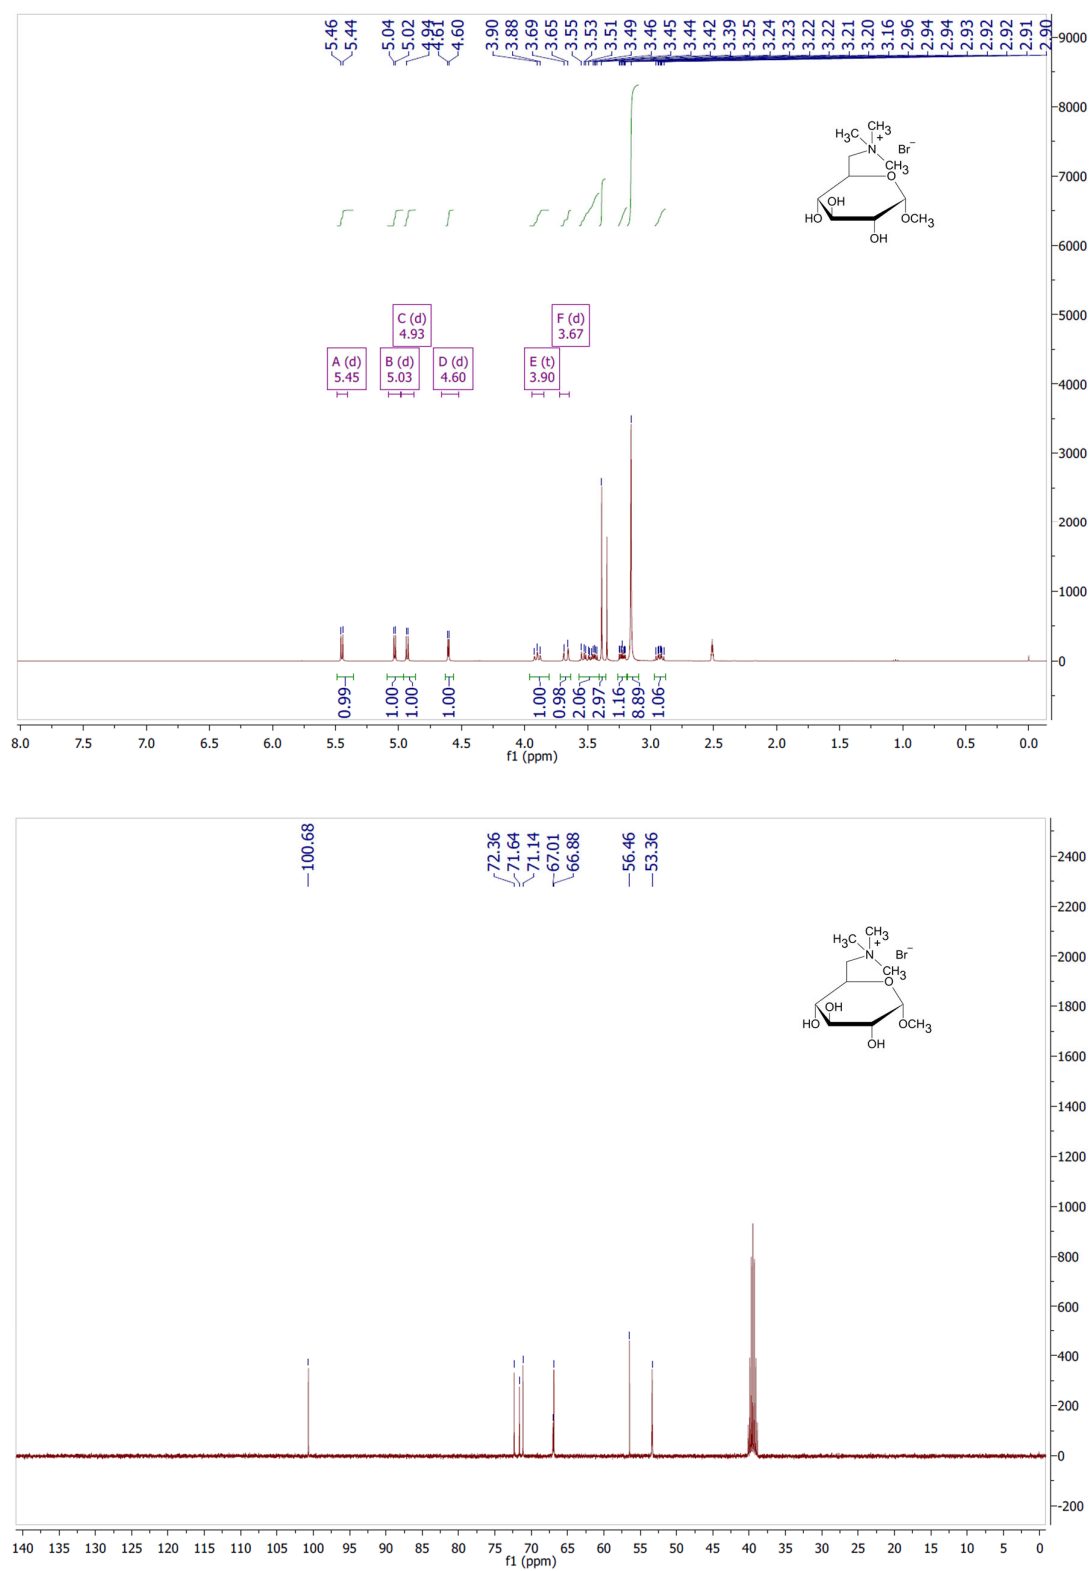

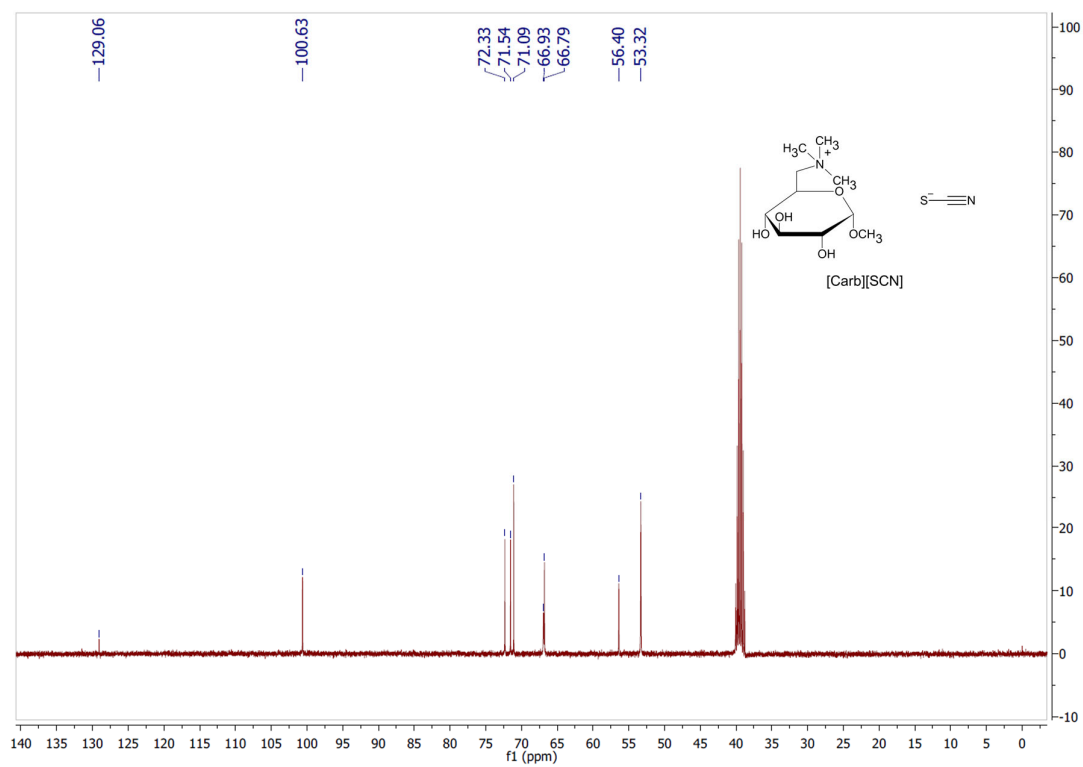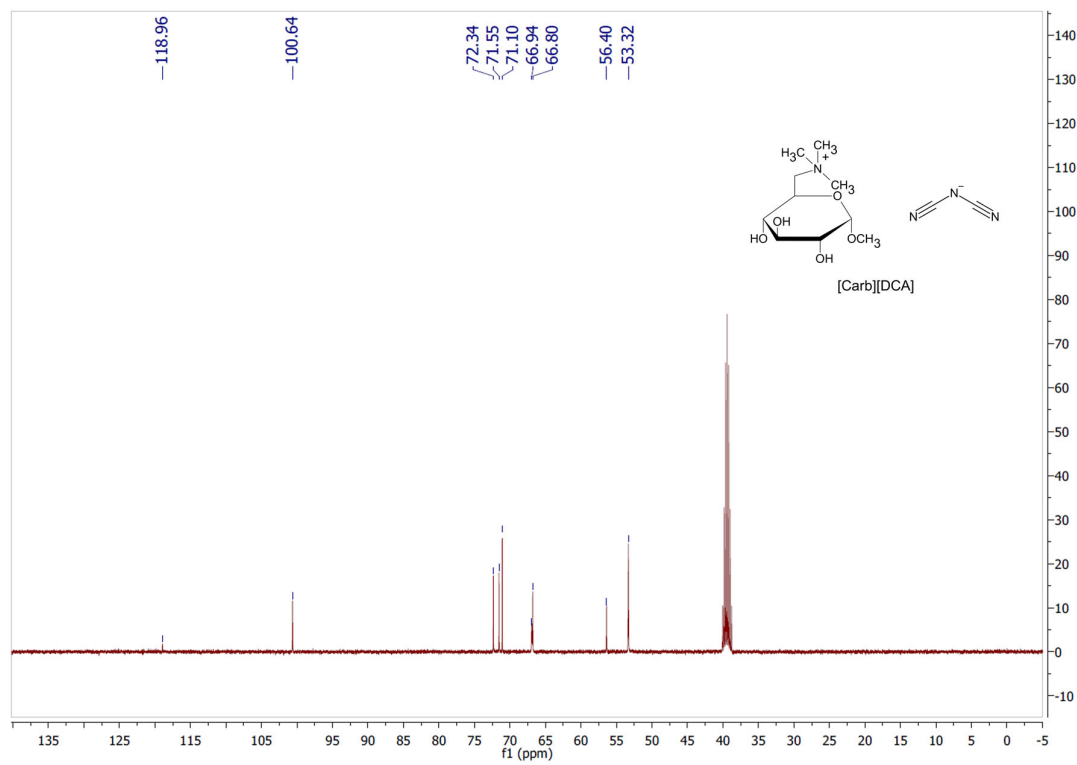

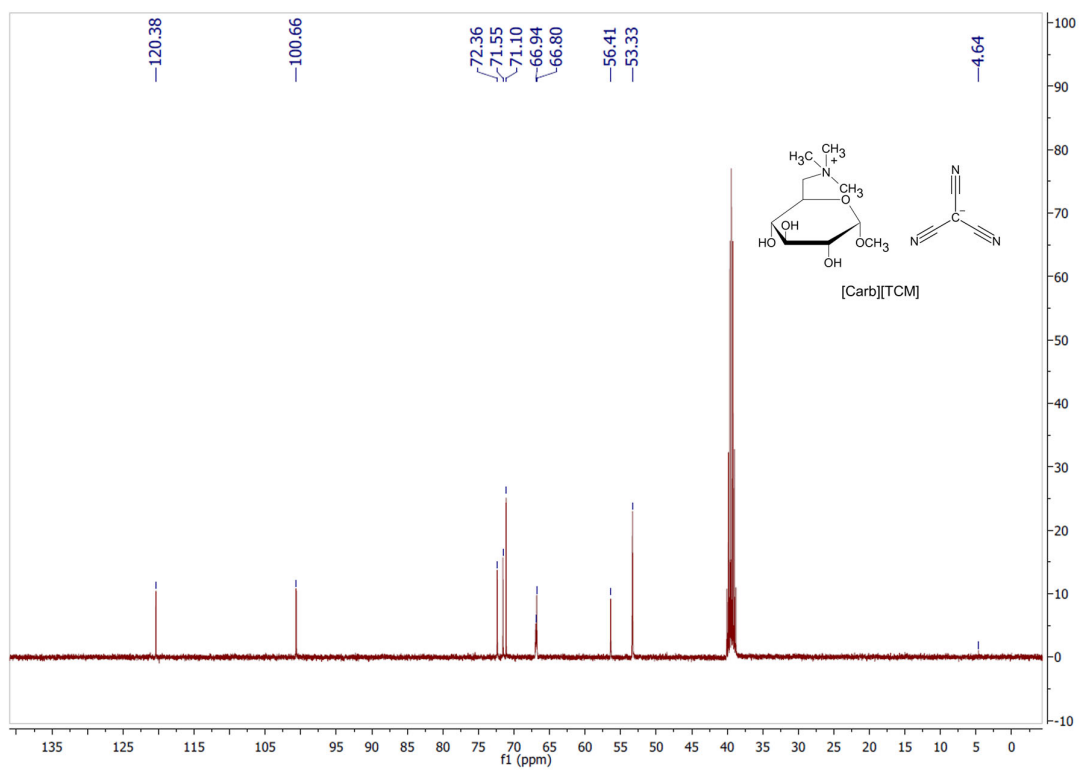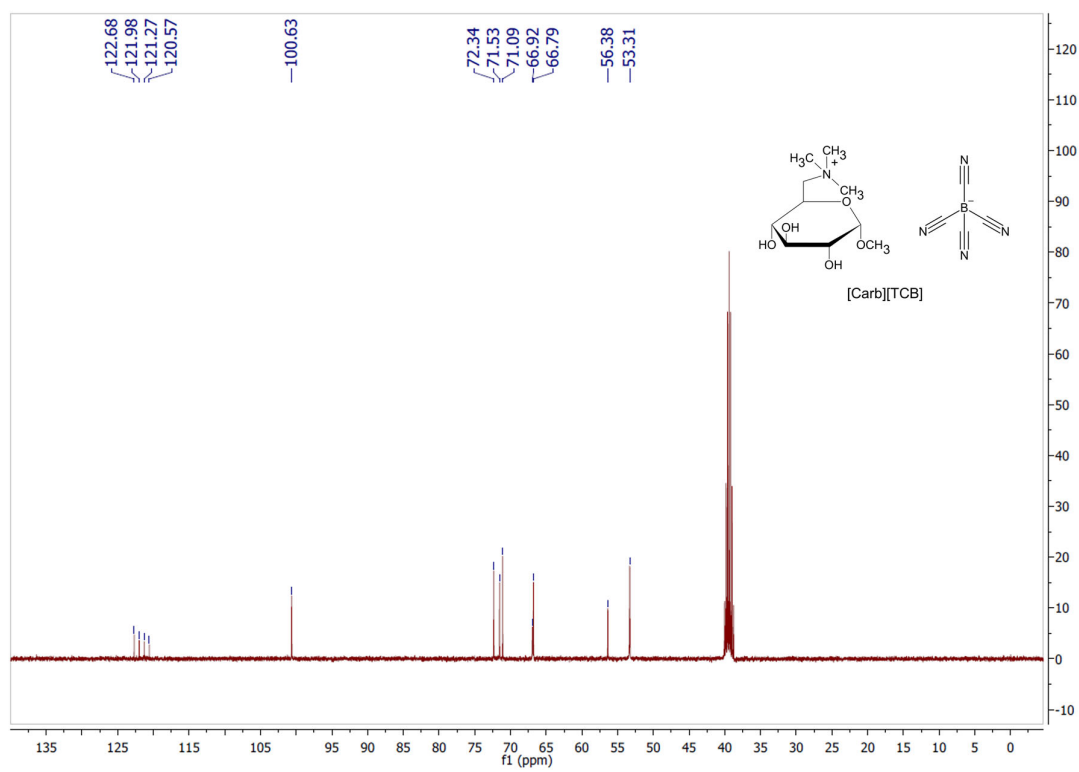

**Figure S2.** MS spectra of the investigated carbohydrate-derived ionic liquids and salts.

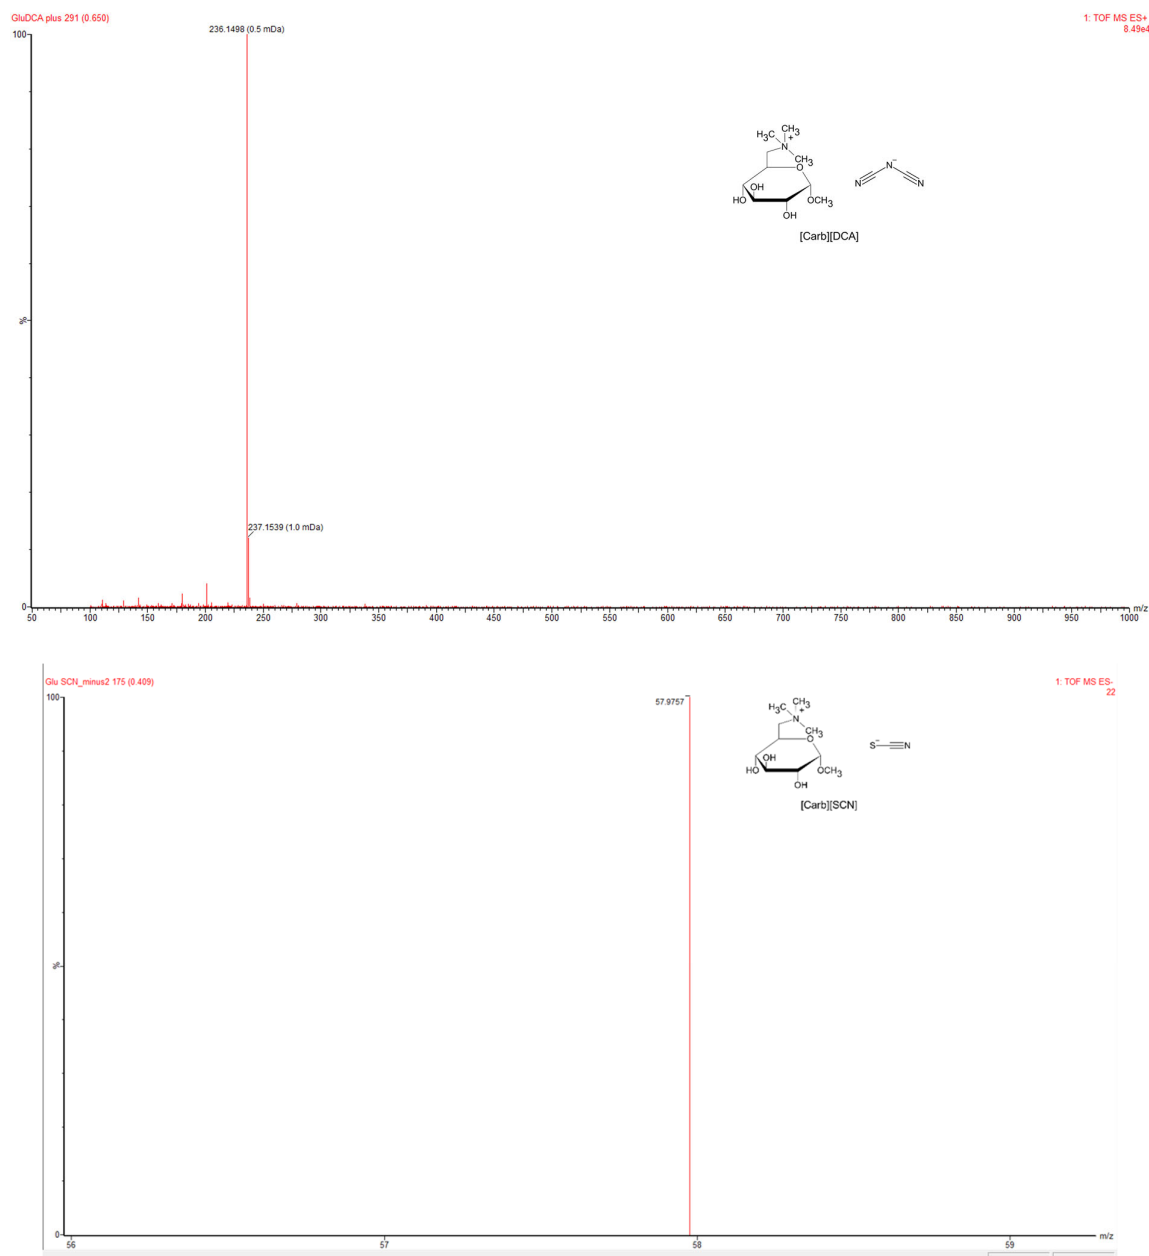

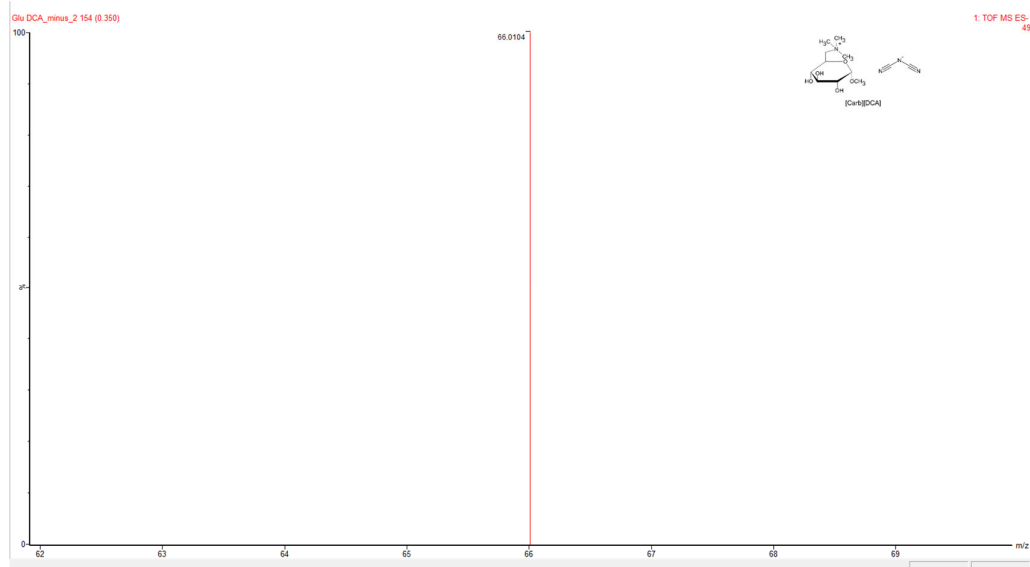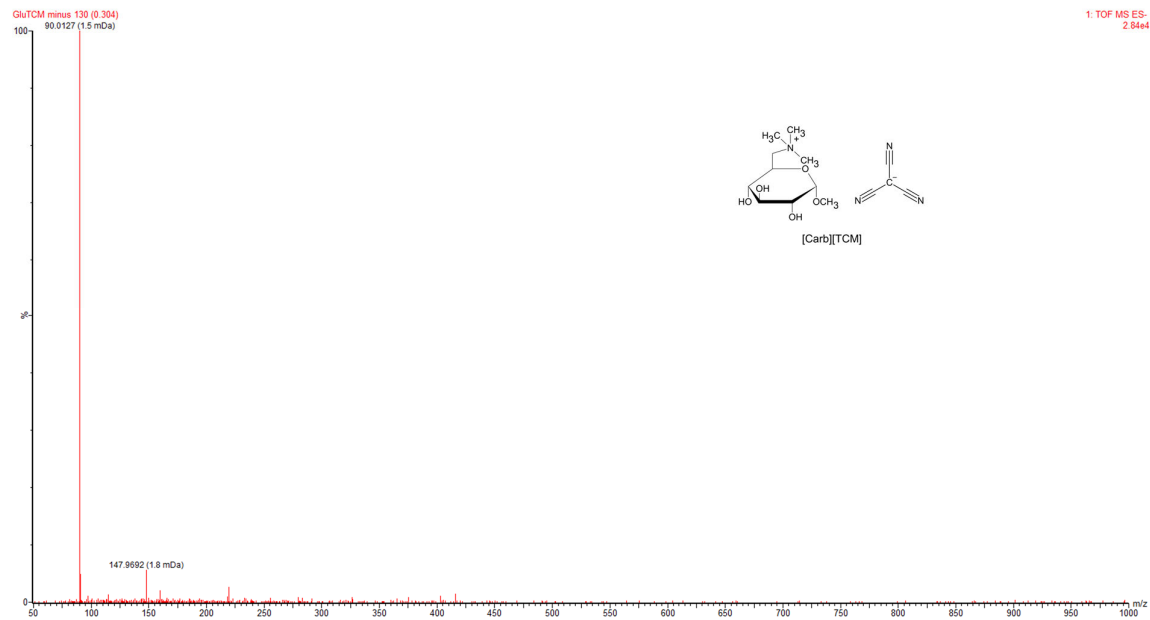

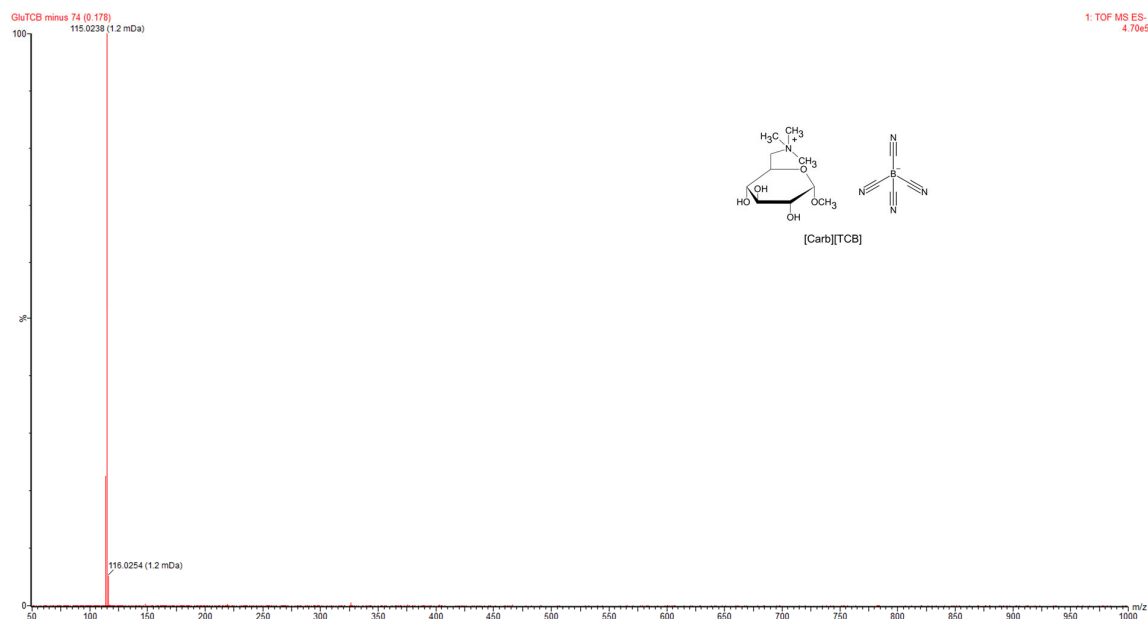

**Figure S3.** Thermal properties of carbohydrate-derived ionic liquids and salts: a) [Carb][DCA]; b) [Carb][SCN], c) [Carb][TCB], d) [Carb][TCM]

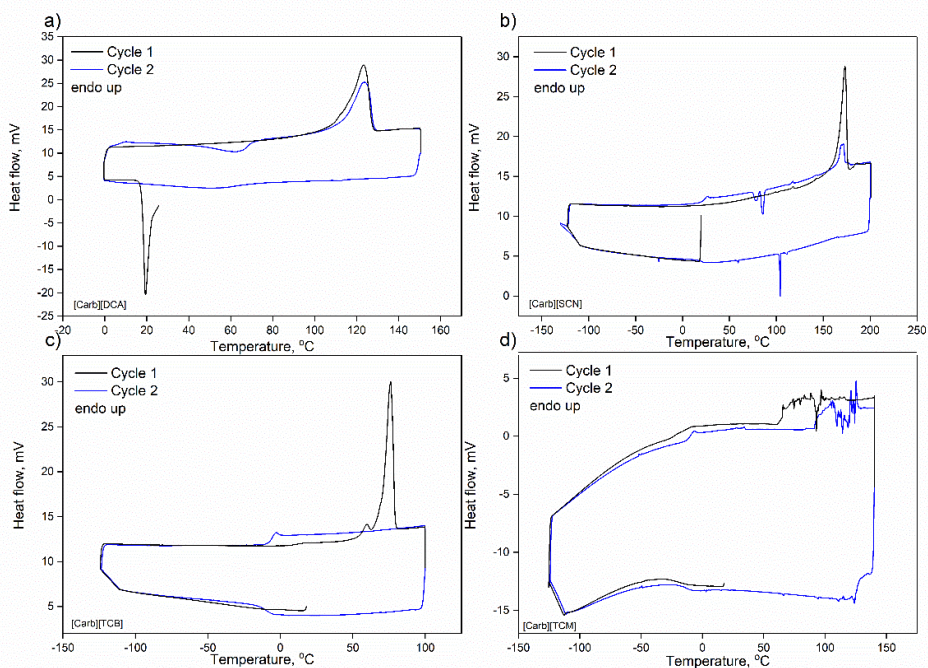

**Figure S4.** IR spectra of [Carb][SCN]\_500 and [Carb][SCN]\_600.

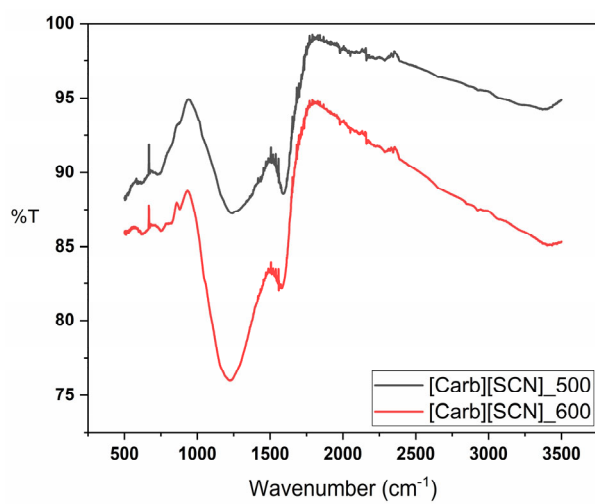

Supplement: s1 [file s1]
